# Supplementary material for: Effect of adsorbed molecules on surface-enhanced Raman scattering of metal/molecule/metal junctions
Source: Royal Society of Chemistry journal article supplement (doi:10.1039/c5ra03987h), 2015-01-01
Supplement: c5ra03987h1.pdf [file c5ra03987h1.pdf]

## Supporting Information

### Effect of Adsorbed Molecules on Surface-enhanced Raman Scattering of Metal/molecule/metal Junctions

Shuangshuang Li<sup>a,b</sup>, Qun Zhou<sup>a,\*</sup>, Wenya Chu<sup>a</sup>, Wei Zhao<sup>a</sup>, Junwei Zheng<sup>a,b,\*</sup>

<sup>a</sup> College of Chemistry, Chemical Engineering and Materials Science, and Soochow University, Suzhou 215123, P. R. China;

<sup>b</sup> College of Physics, Optoelectronics and Energy, Soochow University, Suzhou 215006, P. R. China.

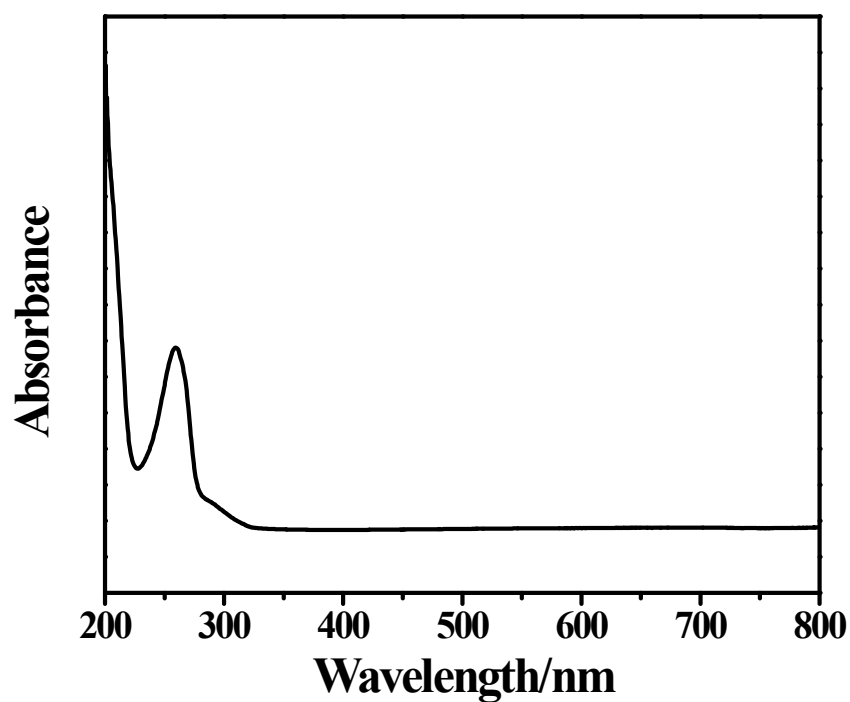

Fig. S1 The UV-Vis spectrum of bare BDT

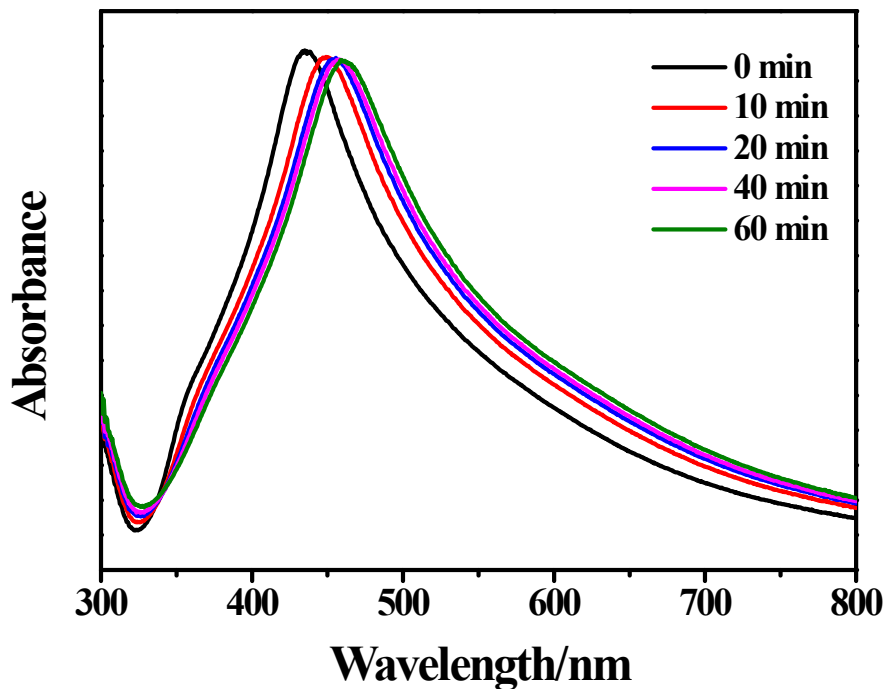

Fig. S2 The alteration of UV-Vis spectra of Ag/PATP/Ag with the extension of the adsorption time of 1,4-BDT

As shown in Fig. S2, the band shape is narrower than the one shown in Fig. 5 in the main text. This difference of band shape is probably due to the drying of the sample (Fig. 5 in the main text) during UV-Vis measurements. In the drying process, some AgNPs can be aggregated because of the diminishing of electrostatic interaction which would lead to the widening of the band of UV-Vis spectrum.

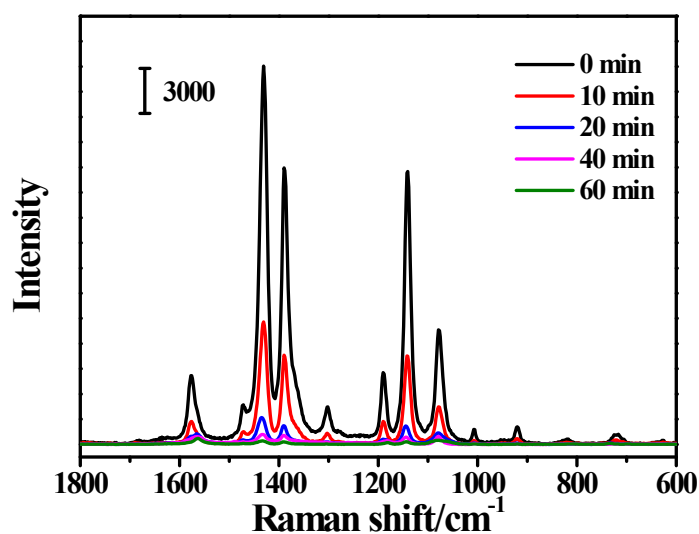

Fig. S3 The alteration of SERS spectra of Ag/PATP/Ag with the extension of the adsorption time of 1,4-BDT
